# Supplementary material for: Interpreting HIV diagnostic histories into infection time estimates: analytical framework and online tool
Source: BMC Infect Dis. 2019 Oct 26;19:894. doi: 10.1186/s12879-019-4543-9 (PMC6815418; doi:10.1186/s12879-019-4543-9)
Supplement: Supplementary file 2 — Additional file 2: Appendix B. Infection Dating Tool Web Interface. (PDF 963 kb) [file 12879_2019_4543_MOESM2_ESM.pdf]

## Appendix B: Infection Dating Tool Web Interface

*Supplementary material to Grebe E, Facente SN, Bingham J, Pilcher CD, Powrie A, Gerber J, Priede G, Chibawara T, Busch MP, Murphy G, Kassanjee R, Welte A. Interpreting HIV Diagnostic Histories into Infection Time Estimates: Analytical Framework and Online Tool.*

Once logged in, the system presents users with four primary pages, accessible via links spread in horizontal tabs below the header, as shown in Figure 1. The first three are described in turn below, with the fourth the subject of a separate publication (Welte, et al., forthcoming).

**Figure B.1: Navigation<sup>a</sup>**

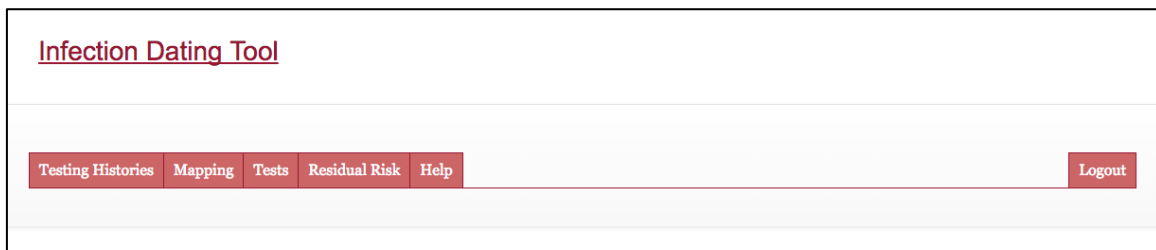

<sup>a</sup>The logic and diagnostic test performance data required for infection dating has significant overlap with that required to calculate the residual risk of infectious material being missed by screening algorithms applied to blood products. Therefore, the online tool has a residual risk calculator built into it as well. This aspect of the tool is discussed and presented in a separate article (Welte et al., forthcoming).

### Testing Histories

This tab (Figure 2) allows users to locate, view and delete previously uploaded 'testing histories', and to upload new ones. It is also where users trigger the action of processing the uploaded testing histories into 'infection dating estimates', which can then be viewed and downloaded.

**Figure B.2: Testing Histories**

| Testing Histories          | Mapping                    | Tests         | Residual Risk           | Help                    | Logout                       |
|----------------------------|----------------------------|---------------|-------------------------|-------------------------|------------------------------|
| <b>Data file:</b>          |                            |               |                         |                         |                              |
| Choose file No file chosen |                            |               |                         |                         |                              |
| Upload                     |                            |               |                         |                         |                              |
| Name                       | Date Uploaded              | File State    |                         |                         |                              |
| ExampleData2_cPC35L4       | Nov. 20, 2018, 7:53 p.m.   | processed     | <a href="#">Mapping</a> | <a href="#">Process</a> | <a href="#">View Results</a> |
| ExampleData2               | Nov. 20, 2018, 7:47 p.m.   | processed     | <a href="#">Mapping</a> | <a href="#">Process</a> | <a href="#">View Results</a> |
| ExampleData_OxvKVad        | Nov. 15, 2018, 7:24 p.m.   | processed     | <a href="#">Mapping</a> | <a href="#">Process</a> | <a href="#">View Results</a> |
| ExampleData_6u9HiQD        | Nov. 15, 2018, 7:11 p.m.   | processed     | <a href="#">Mapping</a> | <a href="#">Process</a> | <a href="#">View Results</a> |
| Rakai_R15_TestHist         | May 17, 2018, 9:44 a.m.    | processed     | <a href="#">Mapping</a> | <a href="#">Process</a> | <a href="#">View Results</a> |
| SABES_HIV_Testing_WjiCQtz  | April 20, 2018, 11:40 a.m. | needs_mapping | <a href="#">Mapping</a> |                         |                              |
| JHU_testhistory_UECISbG    | Jan. 24, 2018, 3:31 p.m.   | processed     | <a href="#">Mapping</a> | <a href="#">Process</a> | <a href="#">View Results</a> |

## Mapping

This tab (Figure 3) allows users to link strings (alphanumeric codes) in their data files to tests in the online database, hence linking records in uploaded files to the applicable diagnostic delays.

**Figure B.3: Mapping**

Testing Histories Mapping Tests Residual Risk Help Logout

Mapping for ExampleData\_Vfz1S9H  
Please complete any maps without all three values

| Code             | Test                                        | Property        |      |
|------------------|---------------------------------------------|-----------------|------|
| WesternBlotFull  | BioRad GS HIV-1 Western blot Fully Reactive | CEPHIA Estimate | Edit |
| PoCRT            | Trinity Biotech Unigold Rapid HIV Test      | CEPHIA Estimate | Edit |
| WesternBlotIndet | BioRad GS HIV-1 Western blot Indeterminate  | CEPHIA Estimate | Edit |
| QualitativeVL    | Aptima HIV-1 RNA Qualitative Assay          | CEPHIA Estimate | Edit |

Mapping completed

Validate Mapping Return to data files

## Tests

This tab (Figure B.4a) allows users to view the existing database of diagnostic tests, and to add new ones if necessary. Note that each user sees only the shared developer-maintained list of tests, plus his/her own – not those added by other users. This page further allows the user to select between computing EP-DDI and LP-DDI using naïve diagnostic delay medians, or to utilise the  $\sigma$  parameter and a specified value of  $\alpha$  to compute credibility intervals (see Figures B.4b and B.4c).

Figure B.4a: Tests

Calculation parameters: *EP- & LP-DDI will represent 95% Credibility Intervals*

**Your tests**

Add a new test

| Name                               | Category     |                      |
|------------------------------------|--------------|----------------------|
| AmplacorIndDBS1000                 | Viral Load   | <a href="#">Edit</a> |
| Ampliscreen pool of 5              | Viral Load   | <a href="#">Edit</a> |
| BioMerieux Vitek WB Fully Reactive | Western blot | <a href="#">Edit</a> |
| BioMerieux Vitek WB Indeterminate  | Western blot | <a href="#">Edit</a> |
| Generic Viral Load DT42            | Viral Load   | <a href="#">Edit</a> |
| ID-NAT ULTRIO                      | Viral Load   | <a href="#">Edit</a> |
| MP-NAT (pool of 16, LoD50 of 1.7)  | Viral Load   | <a href="#">Edit</a> |
| MP-NAT (pool of 8, LoD50 of 1.7)   | Viral Load   | <a href="#">Edit</a> |
| PooledNATDT100x5 (effective 500)   | Viral Load   | <a href="#">Edit</a> |
| SANBS NAT                          | Viral Load   | <a href="#">Edit</a> |

**Global tests**

**Western blot**

|                                             |                      |
|---------------------------------------------|----------------------|
| BioRad GS HIV-1 Western blot Fully Reactive | <a href="#">Edit</a> |
| BioRad GS HIV-1 Western blot Indeterminate  | <a href="#">Edit</a> |

**1st Gen Lab Assay (Viral Lysate IgG sensitive Antibody)**

|                               |                      |
|-------------------------------|----------------------|
| Murex ICE HIV-1.O.2 EIA       | <a href="#">Edit</a> |
| Unspecified 1st Gen Lab Assay | <a href="#">Edit</a> |

Figure B.4b: Naïve estimates using median diagnostic delays

Calculation parameters: *EP- & LP-DDI will be based on Median diagnostic delays*

Viral load growth rate estimate

0.35

*Fiebig et al. (AIDS 2003): 0.35 log<sub>10</sub> copies/ml/day*

Calculate DDI bounds:

Using Median diagnostic delays

[Reset to defaults](#) [Submit](#)

**Figure B.4c: Computing credibility intervals**

Calculation parameters: EP- & LP-DDI will represent 95% Credibility Intervals

Viral load growth rate estimate  
  
*Fiebig et al. (AIDS 2003): 0.35 log<sub>10</sub> copies/ml/day*

Calculate DDI bounds:  Significance level (alpha) for credibility intervals

[Reset to defaults](#) [Submit](#)

**Results**

Processing can be triggered after test codes have been mapped to specific assays in the database. If test property estimates other than the default are preferred, these can be selected on the mapping screen prior to processing. Each file that has been uploaded on the “Testing Histories” tab has a “Mapping” link, and once mapping has been completed, a “Process” link appears. After processing, results can be viewed and downloaded on a per-file basis. Figure B.5a shows EP-DDI and LP-DDI based on median diagnostic delays, and Figure B.5b shows 95% credibility intervals.

**Figure B.5a: Results**

| Testing Histories                                | Mapping       | Tests         | Residual Risk | Help          | Logout                                                                                                                             |
|--------------------------------------------------|---------------|---------------|---------------|---------------|------------------------------------------------------------------------------------------------------------------------------------|
| These are your results for: ExampleData2_cPC35L4 |               |               |               |               |                                                                                                                                    |
| <a href="#">Download Results</a>                 |               |               |               |               |                                                                                                                                    |
| Subject                                          | EP DDI        | LP DDI        | DDI Interval  | EDDI          | Flags                                                                                                                              |
| Subject A                                        | Dec. 16, 2016 | Jan. 6, 2017  | 21            | Dec. 26, 2016 | All tests reported are on same date<br>EP-DDI & LP-DDI based on median diagnostic delays<br>Subject has a discordant test date     |
| Subject B                                        | Aug. 19, 2016 | Jan. 6, 2017  | 140           | Oct. 28, 2016 | EP-DDI & LP-DDI based on median diagnostic delays                                                                                  |
| Subject C                                        | Aug. 28, 2014 | Sept. 4, 2014 | 7             | Aug. 31, 2014 | EP-DDI & LP-DDI based on median diagnostic delays<br>Subject has a discordant test date<br>EPDDI and LPDDI less than 10 days apart |

**Figure B.5b: Results (95% CIs)**

| Testing Histories                                | Mapping       | Tests         | Residual Risk | Help          | Logout                                                                                                                          |
|--------------------------------------------------|---------------|---------------|---------------|---------------|---------------------------------------------------------------------------------------------------------------------------------|
| These are your results for: ExampleData2_cPC35L4 |               |               |               |               |                                                                                                                                 |
| <a href="#">Download Results</a>                 |               |               |               |               |                                                                                                                                 |
| Subject                                          | EP DDI        | LP DDI        | DDI Interval  | EDDI          | Flags                                                                                                                           |
| Subject A                                        | Dec. 11, 2016 | Jan. 5, 2017  | 25            | Dec. 23, 2016 | All tests reported are on same date<br>EP-DDI & LP-DDI represent 95% Credibility Interval<br>Subject has a discordant test date |
| Subject B                                        | Aug. 21, 2016 | Jan. 3, 2017  | 135           | Oct. 27, 2016 | EP-DDI & LP-DDI represent 95% Credibility Interval                                                                              |
| Subject C                                        | Aug. 24, 2014 | Sept. 5, 2014 | 12            | Aug. 30, 2014 | EP-DDI & LP-DDI represent 95% Credibility Interval<br>Subject has a discordant test date                                        |
